# Supplementary material for: Individualized Goal Setting for Pediatric Intensive Care Unit-Based Rehabilitation Using the Canadian Occupational Performance Measure
Source: MDPI journal article supplement (doi:10.3390/children10060985), 2023-05-31
Supplement: s1 [file s1]

## *Supplementary Material*

### *Article*

# **Individualized Goal Setting for Pediatric Intensive Care Unit-based Rehabilitation Using the Canadian Occupational Performance Measure**

**Youngsub Hwang <sup>1</sup>, Jeong-Yi Kwon <sup>2\*</sup>, Joongbum Cho <sup>3</sup> and Jaeyoung Choi <sup>3</sup>**

<sup>1</sup> Department of Health Sciences and Technology, Samsung Advanced Institute for Health Sciences and Technology, Sungkyunkwan University, Seoul, Republic of Korea

<sup>2</sup> Department of Physical and Rehabilitation Medicine, Sungkyunkwan University School of Medicine, Samsung Medical Center, Seoul, Republic of Korea

<sup>3</sup> Department of Critical Care Medicine, Sungkyunkwan University School of Medicine, Samsung Medical Center, Seoul, Republic of Korea

\* Correspondence: jeongyi.kwon@samsung.com; Tel.: +82-4591-1039

### **Table of contents**

**Table S1.** Summary of responses to COPM interview that generated as functional goals

**Table S2.** Summary of responses to COPM interview that generated as personal factors

**Table S3.** Clinical indicators for high number of problem lists generated as occupational performance prediction equation in pediatric intensive care units

**Table S4.** Comparison of sensitivity and specificity between the training dataset and test dataset with the developed prediction equation program

**Table S1.** Summary of responses to COPM interview that generated as functional goals

| Goal domains                   | Examples of caregiver's answer                                                                                                       |
|--------------------------------|--------------------------------------------------------------------------------------------------------------------------------------|
| <b>Functional mobility</b>     |                                                                                                                                      |
| Actively repositioning in bed  | "I wish my child could perform side-lying positioning with a maximal assistance to prevent bedsores."                                |
| Sitting whilst leaning back    | "I hope my child to be able to sit in bed with leaning his back by himself, because then he will be able to engage more activities." |
| Sitting on the edge of the bed | "I think my child needs to perform sitting on edge of bed himself to engage in sit-to-stand training session."                       |
| Transfer                       | "I hope my child could participate bed to wheelchair transfer with a maximal assistance."                                            |
| Reaching                       | "I wish she could reach out and grab any objects that are within her reach."                                                         |
| Ambulation                     | "I wish my child could ambulate using a walker with maximal assistance from more than two people."                                   |
| <b>Personal care</b>           |                                                                                                                                      |
| Communication                  | "I wish my child could express his intentions with hand signals or head shakes because I want to know my child's needs."             |
| Personal hygiene               | "I wish my child could participate in bed-bath to prevent bedsores and infections."                                                  |
| Dressing                       | "I wish my child could wear a mask himself to prevent virus or any infections."                                                      |
| <b>Quiet recreation</b>        |                                                                                                                                      |
| Using electronic devices       | "I wish my child could use cellphone so he can play some games for leisure and communicate with us more frequently."                 |

**Table S2.** Summary of responses to COPM interview that generated as personal factors

| Goal domains                | Examples of caregiver's answer                                                                                                                  |
|-----------------------------|-------------------------------------------------------------------------------------------------------------------------------------------------|
| <b>Physiological factor</b> |                                                                                                                                                 |
| Respiratory function        | "I wish my child could breathe herself without a ventilator."                                                                                   |
| Consciousness               | "I hope my child recovers to a level of consciousness that he can respond to being pinched."                                                    |
| Intubation, IV nutrition    | "I hope my child recovers to the point intubation can be removed, because it seems so uncomfortable for him."                                   |
| Urinary catheterization     | "I hope my child recovers to the point that urinary catheterization can be removed. It's confusing because so many lines are connected to him." |
| Sensory                     | "I hope my child's delirium symptom get better."                                                                                                |
| Body temperature            | "I wish his body temperature to go down."                                                                                                       |
| Cough                       | "I hope my child stops coughing."                                                                                                               |
| Swelling                    | "I hope the swelling on his both legs reduces."                                                                                                 |
| <b>Physical factor</b>      |                                                                                                                                                 |
| Muscle strength             | "I wish my child to recover more than 50% of her strength before admission to PICU."                                                            |
| Stiffness                   | "I wish the stiffness in both his legs reduces."                                                                                                |
| Range of motion             | "I wish my child to recover more than 50% of her range of motion of both legs and arms before admission to PICU."                               |

**Table S3.** Clinical indicator for high number of problem lists generated as occupational performance prediction equation in pediatric intensive care units

| Target       | Var       | Beta    | Standard error | P-value |
|--------------|-----------|---------|----------------|---------|
| nOP $\geq 4$ | Intercept | 5.2961  | 3.4267         | 0.122   |
|              | STAI-X-1  | -0.1429 | 0.0699         | 0.041   |

Stepwise variable selection method in logistic regression ( $P < 0.05$ ). nOP, number of problem lists generated as occupational performance; STAI-X-1, State-Trait Anxiety Inventory

**Table S4.** Comparison of sensitivity and specificity between the training dataset and test dataset with the developed prediction equation program

| Target       | Cutoff | TP | FN | FP | TN | AUC   | 95% CI of<br>the AUC |       | Sensitivity | Specificity | J     |
|--------------|--------|----|----|----|----|-------|----------------------|-------|-------------|-------------|-------|
| nOP $\geq 4$ | 0.08   | 4  | 0  | 9  | 28 | 0.878 | 0.808                | 0.948 | 1.000       | 0.757       | 0.757 |

TP, true positives; FN, false negatives; FP, false positives; TN, true negatives; J, Youden index; CI, confidence interval; AUC, area under the curve; nOP, number of problem lists generated as occupational performance
